# Supplementary material for: The Phenolic Profile of Sweet Cherry Fruits Influenced by Cultivar/Rootstock Combination
Source: MDPI journal article supplement (doi:10.3390/plants12010103), 2022-12-25
Supplement: s1 [file s1]

**Table S1.** Identification of phenolic compounds in cherry fruits in positive and negative ionization with HPLC-MS and MS<sup>2</sup>/MS<sup>3</sup>

| Phenolic compounds                                   | Abbreviation         | $\lambda_{\text{max}}$<br>(nm) | [M-H]<br>*[M+H] <sup>+</sup> (m/z)* | MS <sup>2</sup> (m/z)           | MS <sup>3</sup> (m/z) |
|------------------------------------------------------|----------------------|--------------------------------|-------------------------------------|---------------------------------|-----------------------|
| <b>Anthocyanins</b>                                  |                      |                                |                                     |                                 |                       |
| Cyanidin-3-rutinoside                                | cy-3-rut             | 280, 522                       | 595                                 | 449/287                         |                       |
| Cyanidin-3-glucoside                                 | cy-3-glu             | 280, 519                       | 449                                 | 287                             |                       |
| Pelargonidin-3-rutinoside                            | pe-3-rut             | 278, 504                       | 579                                 | 433/271                         |                       |
| Peonidin-3-rutinoside                                | peo-3-rut            | 280, 523                       | 609                                 | 463/301                         |                       |
| <b>Flavanols</b>                                     |                      |                                |                                     |                                 |                       |
| Quercetin-7-glucoside-3-rutinoside                   | qu-7-glu-3-rut       | 256, 355                       | 771                                 | 609                             | 301                   |
| Quercetin-3-rutinoside                               | qu-3-rut             | 255,355                        | 609                                 | 301                             |                       |
| Quercetin-3-galactoside                              | qu-3-gal             | 256,356                        | 463                                 | 301                             |                       |
| Quercetin-3-glucoside                                | qu-3-glu             | 255,355                        | 463                                 | 301                             |                       |
| Kaempferol-3-rutinoside                              | kae-3-rut            | 264,345                        | 593                                 | 285                             |                       |
| Isorhamnetin-3-rutinoside                            | iso-3-rut            | 256, 354                       | 623                                 | 315                             |                       |
| Kaempferol-3-glucoside                               | kae-3-glu            | 266,298,346                    | 447                                 | 285                             |                       |
| <b>Flavanols</b>                                     |                      |                                |                                     |                                 |                       |
| Procyanidin dimer 1                                  | pro dim 1            | 235,278                        | 577                                 | 425,451,407,289                 |                       |
| Procyanidin dimer 2                                  | pro dim 2            | 234,278                        | 577                                 | 425,451,407,289                 |                       |
| Catechin                                             | cat                  | 234, 279                       | 289                                 | 245                             |                       |
| Procyanidin trimer 1                                 | pro tri 1            | 234,278                        | 865                                 | 577,407,289                     |                       |
| Procyanidin dimer 3                                  | pro dim 3            | 235,279                        | 577                                 | 425,407,289                     |                       |
| Procyanidin dimer 4                                  | pro dim 4            | 235, 280                       | 577                                 | 425,451,407,289                 |                       |
| Epicatechin                                          | epicat               | 234,279                        | 289                                 | 245                             |                       |
| Procyanidin trimer 2                                 | pro tri 2            | 234, 280                       | 865                                 | 739, 695, 577,451, 425,407, 289 |                       |
| Procyanidin dimer 5                                  | pro dim 5            | 234,279                        | 577                                 | 451, 425,407,289                |                       |
| Procyanidin dimer 6                                  | pro dim 6            | 234,279                        | 577                                 | 425,407,289                     |                       |
| Epicatechin gallate                                  | epicat gal           | 234, 280                       | 441                                 | 289                             |                       |
| <b>Flavanones</b>                                    |                      |                                |                                     |                                 |                       |
| Naringenin hexoside 1                                | na hex 1             | 213, 225, 289                  | 433                                 | 271                             |                       |
| Naringenin hexoside 2                                | na hex 2             | 213, 225, 289                  | 433                                 | 271                             |                       |
| Taxifolin rutinoside                                 | tax rut              | 286                            | 611                                 | 285, 485, 475, 241,303          |                       |
| Taxifolin hexoside                                   | tax hex              | 288                            | 465                                 | 285, 241, 417, 303              |                       |
| <b>Hydroxycinnamic acids</b>                         |                      |                                |                                     |                                 |                       |
| 3- <i>p</i> -coumaroylquinic acid                    | 3- <i>p</i> -CoQA    | 312                            | 337                                 | 163                             |                       |
| 4- <i>p</i> -coumaroylquinic acid                    | 4-CoQA               | 312                            | 337                                 | 173, 163, 155, 137, 191         |                       |
| Dicaffeoylquinic acid 1                              | di CQA 1             | 246, 316                       | 515                                 | 353                             | 191                   |
| Dicaffeoylquinic acid 2                              | di CQA 2             | 247, 321                       | 515                                 | 353                             | 191, 179              |
| Caffeoylquinic acid glycoside 1                      | CQA gly 1            | 290, 325                       | 515                                 | 341, 353, 335, 179, 191         |                       |
| Caffeoylquinic acid glycoside 2                      | CQA gly 2            | 290, 324                       | 515                                 | 341, 353, 173, 179              |                       |
| Caffeic acid glycoside 1                             | CA gly 1             | 293, 325                       | 341                                 | 179,135                         |                       |
| <i>cis</i> -3-caffeoylquinic acid ( <i>cis</i> 3CQA) | c-3- CQA             | 234, 326                       | 353                                 | 191, 179, 135                   | 173, 127, 85          |
| Neochlorogenic acid ( <i>trans</i> 3CQA)             | neoCQA               | 234, 326                       | 353                                 | 191,179,135                     | 173, 127, 85          |
| Caffeic acid hexoside 1                              | CA hex 1             | 330                            | 341                                 | 179                             |                       |
| Caffeoylquinic acid glycoside 3                      | CQA gly 3            | 290, 326                       | 515                                 | 341, 353, 179, 173              |                       |
| Caffeic acid hexoside 2                              | CA hex 2             | 330                            | 341                                 | 179                             |                       |
| <i>p</i> -coumaric acid hexoside                     | <i>p</i> -couQA hex  | 311                            | 325                                 | 163                             |                       |
| <i>trans</i> 3- <i>p</i> -coumaroylquinic acid       | t-3- <i>p</i> -CoQA, | 312                            | 337                                 | 163                             |                       |
| <i>trans</i> 4-caffeoylquinic acid                   | t-4- <i>p</i> -CQA   | 234,328                        | 353                                 | 173,179,191,135                 |                       |
| <i>trans</i> 5-caffeoylquinic acid                   | t-5-CQA              | 234,328                        | 353                                 | 191,179,173,135                 |                       |
| <i>cis</i> -3- <i>p</i> -coumaroylquinic acid        | c-3- <i>p</i> -CoQA  | 312                            | 337                                 | 163                             |                       |
| <i>cis</i> 3-feruloylquinic acid                     | c-3-FQA              | 320                            | 367                                 | 193,134                         |                       |
| <i>cis</i> 4-caffeoylquinic acid                     | c-4-CQA              | 234,328                        | 353                                 | 173,179,191,135                 | 149                   |
| <i>trans</i> 3-feruloylquinic acid                   | t-3-FQA              | 320                            | 367                                 | 193,134                         | 149                   |
| Sinapic acid hexoside                                | sin A hex            | 236, 326                       | 385                                 | 223, 205, 191                   |                       |
| <i>trans</i> -5-feruloylquinic acid                  | t-5-FQA              | 322                            | 367                                 | 193, 134                        |                       |
| Caffeic acid glycoside 2                             | CA gly 2             | 293, 326                       | 341                                 | 179,135                         |                       |
| Feruloyl hexoside                                    | Fhex                 | 328                            | 355                                 | 193,217,295,175,235             |                       |
| <i>cis</i> 5-caffeoylquinic acid                     | c-5-CQA              | 234,328                        | 353                                 | 191,179,135                     |                       |
| <i>trans</i> 4- <i>p</i> -coumaroylquinic acid       | t-4- <i>p</i> -CoQA  | 312                            | 337                                 | 173, 163, 155, 137, 191         |                       |
| <i>cis</i> -4- <i>p</i> -coumaroylquinic acid        | c-4- <i>p</i> -CoQA  | 311                            | 337                                 | 173, 163, 137, 191              |                       |
| 5- <i>p</i> -coumaroylquinic acid                    | 5- <i>p</i> -CpQA    | 311                            | 337                                 | 191,163,173                     |                       |

\*[M+H]<sup>+</sup> (m/z) anthocyanins were obtained in the positive ion mode, other phenolics in the negative ion mode

**Table S2.** Content of all individual and total flavanols in fruits of sweet cherry cultivars on different rootstocks (mg/kg of fresh weight, average 2020-2021).

| Combination<br>cultivar/rootstock |            | Procyanidin<br>dimer 6   | Procyanidin<br>dimer 1   | Procyanidin<br>dimer 2   | Catechin                 | Procyanidin<br>trimer 1  | Procyanidin<br>dimer 3   | Procyanidin<br>dimer 4   | Epicatechin               | Procyanidin<br>trimer 2   | Procyanidin<br>dimer 5   | Epicatechin<br>gallate   | Total<br>flavanols       |
|-----------------------------------|------------|--------------------------|--------------------------|--------------------------|--------------------------|--------------------------|--------------------------|--------------------------|---------------------------|---------------------------|--------------------------|--------------------------|--------------------------|
| Carmen/Mahaleb                    |            | 0.33±0.02 <sup>b-d</sup> | 3.96±0.73 <sup>ef</sup>  | 1.11±0.18 <sup>d-f</sup> | 2.13±0.28 <sup>c-f</sup> | 1.9±0.25 <sup>c-f</sup>  | 0.35±0.08 <sup>fg</sup>  | 3.77±0.39 <sup>fg</sup>  | 7.87±0.84 <sup>b-d</sup>  | 6.17±0.75 <sup>i</sup>    | 1.06±0.31 <sup>f</sup>   | 0.75±0.21 <sup>f</sup>   | 29.4±6.3 <sup>e</sup>    |
| Carmen/Colt                       |            | 0.50±0.08 <sup>a-d</sup> | 4.61±0.34 <sup>c-f</sup> | 1.94±0.21 <sup>b-e</sup> | 2.67±0.12 <sup>a-e</sup> | 2.38±0.11 <sup>a-e</sup> | 0.44±0.04 <sup>d-g</sup> | 4.46±0.50 <sup>d-g</sup> | 10.65±0.94 <sup>a-c</sup> | 4.76±0.23 <sup>i</sup>    | 1.15±0.13 <sup>f</sup>   | 0.90±0.23 <sup>f</sup>   | 34.4±6.5 <sup>de</sup>   |
| Carmen/Oblacinska                 |            | 0.42±0.04 <sup>a-d</sup> | 5.74±0.33 <sup>a-e</sup> | 1.37±0.34 <sup>d-f</sup> | 3.14±0.16 <sup>a-c</sup> | 2.80±0.14 <sup>a-c</sup> | 0.37±0.10 <sup>e-g</sup> | 3.35±0.41 <sup>g</sup>   | 11.83±0.71 <sup>ab</sup>  | 9.74±0.61 <sup>f-h</sup>  | 1.65±0.27 <sup>d-f</sup> | 2.28±0.33 <sup>b-d</sup> | 40.2±3.9 <sup>b-e</sup>  |
| Carmen/M×M 14                     |            | 0.38±0.07 <sup>b-d</sup> | 5.39±0.26 <sup>b-f</sup> | 1.87±0.19 <sup>b-e</sup> | 2.49±0.12 <sup>a-f</sup> | 2.22±0.10 <sup>a-f</sup> | 0.51±0.07 <sup>a-f</sup> | 4.23±0.41 <sup>d-g</sup> | 11.34±0.72 <sup>ab</sup>  | 6.05±0.49 <sup>i</sup>    | 1.32±0.17 <sup>ef</sup>  | 0.67±0.14 <sup>f</sup>   | 36.51±7.9 <sup>c-e</sup> |
| Carmen/Gisela 5                   |            | 0.44±0.05 <sup>a-d</sup> | 6.48±0.68 <sup>a-d</sup> | 1.58±0.36 <sup>c-f</sup> | 3.04±0.29 <sup>a-d</sup> | 2.71±0.26 <sup>a-d</sup> | 0.47±0.11 <sup>b-g</sup> | 3.83±0.48 <sup>e-g</sup> | 10.19±1.24 <sup>a-c</sup> | 7.15±0.85 <sup>hi</sup>   | 1.87±0.29 <sup>c-f</sup> | 1.30±0.28 <sup>d-f</sup> | 39.1±3.4 <sup>b-e</sup>  |
| Carmen/Gisela 6                   |            | 0.78±0.24 <sup>a</sup>   | 3.96±0.42 <sup>ef</sup>  | 1.08±0.17 <sup>d-f</sup> | 2.58±0.24 <sup>a-f</sup> | 2.30±0.21 <sup>a-f</sup> | 0.45±0.03 <sup>c-g</sup> | 3.44±0.46 <sup>fg</sup>  | 8.90±0.48 <sup>a-d</sup>  | 7.32±1.15 <sup>hi</sup>   | 1.49±0.33 <sup>d-f</sup> | 1.15±0.20 <sup>ef</sup>  | 33.4±7.4 <sup>de</sup>   |
| Kordia/Mahaleb                    |            | 0.41±0.12 <sup>a-d</sup> | 5.16±0.56 <sup>b-f</sup> | 1.72±0.14 <sup>c-f</sup> | 1.93±0.07 <sup>d-f</sup> | 1.73±0.06 <sup>d-f</sup> | 0.52±0.03 <sup>a-f</sup> | 4.61±0.16 <sup>c-g</sup> | 8.10±1.04 <sup>b-d</sup>  | 12.82±0.86 <sup>b-f</sup> | 2.44±0.21 <sup>c-e</sup> | 1.68±0.31 <sup>c-f</sup> | 41.1±4.3 <sup>b-d</sup>  |
| Kordia/Colt                       |            | 0.44±0.06 <sup>a-d</sup> | 7.90±0.95 <sup>a</sup>   | 3.22±0.41 <sup>a</sup>   | 3.63±0.27 <sup>a</sup>   | 3.24±0.28 <sup>a</sup>   | 0.67±0.09 <sup>a</sup>   | 7.07±0.51 <sup>ab</sup>  | 14.04±1.69 <sup>a</sup>   | 14.64±1.63 <sup>b-d</sup> | 2.57±0.42 <sup>c-e</sup> | 1.63±0.28 <sup>c-f</sup> | 59.1±4.9 <sup>a</sup>    |
| Kordia/Oblacinska                 |            | 0.41±0.08 <sup>a-d</sup> | 7.08±0.53 <sup>a-c</sup> | 2.15±0.39 <sup>a-d</sup> | 2.99±0.29 <sup>a-d</sup> | 2.67±0.26 <sup>a-d</sup> | 0.65±0.05 <sup>ab</sup>  | 4.92±0.45 <sup>c-g</sup> | 9.13±1.16 <sup>a-d</sup>  | 15.27±1.32 <sup>bc</sup>  | 2.94±0.20 <sup>bc</sup>  | 2.33±0.20 <sup>b-d</sup> | 50.4±5.9 <sup>ab</sup>   |
| Kordia/M×M 14                     |            | 0.38±0.07 <sup>b-d</sup> | 7.41±0.50 <sup>ab</sup>  | 2.88±0.37 <sup>ab</sup>  | 2.31±0.38 <sup>b-f</sup> | 2.06±0.34 <sup>b-f</sup> | 0.64±0.05 <sup>ab</sup>  | 5.95±0.44 <sup>a-d</sup> | 8.85±0.79 <sup>a-d</sup>  | 11.26±0.93 <sup>e-g</sup> | 2.05±0.32 <sup>c-f</sup> | 1.44±0.21 <sup>c-f</sup> | 45.2±6.1 <sup>bc</sup>   |
| Kordia/Gisela 5                   |            | 0.70±0.19 <sup>ab</sup>  | 6.19±0.63 <sup>a-d</sup> | 2.17±0.28 <sup>a-d</sup> | 3.43±0.17 <sup>ab</sup>  | 3.06±0.15 <sup>ab</sup>  | 0.63±0.02 <sup>a-c</sup> | 5.74±0.38 <sup>a-e</sup> | 11.88±1.84 <sup>ab</sup>  | 19.08±0.58 <sup>a</sup>   | 3.93±0.34 <sup>b</sup>   | 2.45±0.19 <sup>a-c</sup> | 59.2±9.1 <sup>a</sup>    |
| Kordia/Gisela 6                   |            | 0.66±0.17 <sup>a-c</sup> | 4.78±0.49 <sup>c-f</sup> | 1.40±0.22 <sup>d-f</sup> | 3.18±0.33 <sup>a-c</sup> | 2.84±0.26 <sup>a-c</sup> | 0.60±0.07 <sup>a-d</sup> | 5.19±0.37 <sup>b-f</sup> | 10.57±1.32 <sup>a-c</sup> | 15.51±0.28 <sup>b</sup>   | 3.13±0.21 <sup>bc</sup>  | 2.02±0.18 <sup>b-e</sup> | 49.9±5.8 <sup>ab</sup>   |
| Regina/Mahaleb                    |            | 0.36±0.05 <sup>b-d</sup> | 3.16±0.32 <sup>f</sup>   | 0.68±0.07 <sup>f</sup>   | 0.71±0.07 <sup>g</sup>   | 0.64±0.06 <sup>g</sup>   | 0.30±0.05 <sup>g</sup>   | 5.34±0.43 <sup>b-f</sup> | 4.55±0.98 <sup>d</sup>    | 9.47±0.65 <sup>gh</sup>   | 2.51±0.31 <sup>c-e</sup> | 1.97±0.31 <sup>b-e</sup> | 29.7±3.5 <sup>e</sup>    |
| Regina/Colt                       |            | 0.32±0.03 <sup>cd</sup>  | 4.41±0.48 <sup>d-f</sup> | 1.63±0.35 <sup>c-f</sup> | 1.70±0.35 <sup>e-g</sup> | 1.52±0.31 <sup>e-g</sup> | 0.51±0.08 <sup>a-f</sup> | 6.91±0.45 <sup>ab</sup>  | 9.55±1.57 <sup>a-d</sup>  | 11.67±1.38 <sup>d-g</sup> | 2.59±0.32 <sup>c-e</sup> | 2.04±0.29 <sup>b-e</sup> | 42.9±5.9 <sup>b-d</sup>  |
| Regina/Oblacinska                 |            | 0.54±0.11 <sup>a-d</sup> | 6.06±0.81 <sup>a-d</sup> | 2.50±0.44 <sup>a-c</sup> | 2.29±0.33 <sup>b-f</sup> | 2.04±0.29 <sup>b-f</sup> | 0.68±0.08 <sup>a</sup>   | 6.54±0.43 <sup>a-c</sup> | 11.73±1.08 <sup>ab</sup>  | 12.06±1.11 <sup>c-g</sup> | 3.10±0.27 <sup>bc</sup>  | 3.00±0.27 <sup>ab</sup>  | 50.5±5.4 <sup>ab</sup>   |
| Regina/M×M 14                     |            | 0.42±0.04 <sup>a-d</sup> | 4.14±0.44 <sup>d-f</sup> | 2.55±0.35 <sup>a-c</sup> | 1.60±0.38 <sup>e-g</sup> | 1.43±0.33 <sup>e-g</sup> | 0.55±0.05 <sup>ab</sup>  | 7.53±0.31 <sup>a</sup>   | 7.30±1.06 <sup>b-d</sup>  | 11.25±0.87 <sup>e-g</sup> | 2.75±0.23 <sup>b-d</sup> | 2.47±0.25 <sup>a-c</sup> | 41.9±6.7 <sup>b-d</sup>  |
| Regina/Gisela 6                   |            | 0.25±0.01 <sup>d</sup>   | 5.38±0.43 <sup>b-f</sup> | 0.86±0.13 <sup>ef</sup>  | 1.44±0.13 <sup>fg</sup>  | 1.32±0.13 <sup>fg</sup>  | 0.59±0.03 <sup>a-d</sup> | 4.63±0.19 <sup>c-g</sup> | 5.46±0.61 <sup>cd</sup>   | 13.04±0.71 <sup>b-e</sup> | 5.21±0.28 <sup>a</sup>   | 3.48±0.13 <sup>a</sup>   | 41.6±4.5 <sup>b-d</sup>  |
| Cultivar                          | Carmen     | 0.47±0.05 <sup>ab</sup>  | 5.02±0.35 <sup>b</sup>   | 1.49±0.11 <sup>b</sup>   | 2.67±0.11 <sup>a</sup>   | 2.38±0.09 <sup>a</sup>   | 0.43±0.02 <sup>c</sup>   | 3.84±0.18 <sup>c</sup>   | 10.13±0.62 <sup>ab</sup>  | 6.86±0.45 <sup>c</sup>    | 1.42 ± 0.11 <sup>c</sup> | 1.17±0.13 <sup>c</sup>   | 37.29±1.69 <sup>c</sup>  |
|                                   | Kordia     | 0.50±0.06 <sup>a</sup>   | 6.42±0.42 <sup>a</sup>   | 2.26±0.21 <sup>a</sup>   | 2.97±0.23 <sup>a</sup>   | 2.60±0.02 <sup>a</sup>   | 0.62±0.02 <sup>a</sup>   | 5.58±0.24 <sup>b</sup>   | 10.43±0.73 <sup>a</sup>   | 14.76±0.69 <sup>a</sup>   | 2.84 ± 0.15 <sup>b</sup> | 1.93±0.11 <sup>b</sup>   | 52.84±3.49 <sup>a</sup>  |
|                                   | Regina     | 0.38±0.03 <sup>b</sup>   | 4.63±0.33 <sup>b</sup>   | 1.65±0.23 <sup>ab</sup>  | 1.55±0.15 <sup>b</sup>   | 1.39±0.13 <sup>b</sup>   | 0.53±0.03 <sup>b</sup>   | 6.19±0.37 <sup>a</sup>   | 7.72±0.75 <sup>b</sup>    | 11.50±0.87 <sup>b</sup>   | 3.23 ± 0.29 <sup>a</sup> | 2.59±0.17 <sup>a</sup>   | 43.33±2.62 <sup>b</sup>  |
| Rootstock                         | Mahaleb    | 0.37±0.04 <sup>b</sup>   | 4.09±0.46 <sup>b</sup>   | 1.17±0.13 <sup>de</sup>  | 1.59±0.18 <sup>c</sup>   | 1.42±0.16 <sup>c</sup>   | 0.39±0.04 <sup>d</sup>   | 4.57±0.28 <sup>b</sup>   | 6.84±0.85 <sup>b</sup>    | 9.49±0.82 <sup>b</sup>    | 2.00±0.25 <sup>b</sup>   | 1.47±0.21 <sup>b</sup>   | 36.12±2.67 <sup>c</sup>  |
|                                   | Colt       | 0.42±0.04 <sup>b</sup>   | 5.64±0.59 <sup>a</sup>   | 2.27±0.33 <sup>ab</sup>  | 2.67±0.33 <sup>a</sup>   | 2.38±0.29 <sup>ab</sup>  | 0.54±0.05 <sup>bc</sup>  | 6.14±0.46 <sup>a</sup>   | 11.41±1.64 <sup>a</sup>   | 10.36±0.51 <sup>b</sup>   | 2.10±0.31 <sup>b</sup>   | 1.52±0.22 <sup>b</sup>   | 49.50±5.81 <sup>ab</sup> |
|                                   | Oblacinska | 0.46±0.05 <sup>b</sup>   | 6.29±0.53 <sup>a</sup>   | 2.01±0.24 <sup>bc</sup>  | 2.81±0.17 <sup>a</sup>   | 2.50±0.05 <sup>a</sup>   | 0.57±0.05 <sup>b</sup>   | 4.94±0.43 <sup>b</sup>   | 10.90±0.97 <sup>a</sup>   | 12.36±0.79 <sup>a</sup>   | 2.56±0.26 <sup>b</sup>   | 2.54±0.17 <sup>a</sup>   | 51.66±3.88 <sup>a</sup>  |
|                                   | MxM 14     | 0.39±0.03 <sup>b</sup>   | 5.64±0.58 <sup>a</sup>   | 2.43±0.29 <sup>a</sup>   | 2.13±0.19 <sup>bc</sup>  | 1.90±0.17 <sup>bc</sup>  | 0.57±0.03 <sup>b</sup>   | 5.90±0.56 <sup>a</sup>   | 9.17±0.58 <sup>ab</sup>   | 9.52±0.91 <sup>b</sup>    | 2.04±0.25 <sup>b</sup>   | 1.52±0.21 <sup>b</sup>   | 44.67±4.33 <sup>bc</sup> |
|                                   | Gisela 5   | 0.67±0.12 <sup>a</sup>   | 5.26±0.57 <sup>ab</sup>  | 1.67±0.23 <sup>cd</sup>  | 2.82±0.18 <sup>a</sup>   | 2.52±0.17 <sup>a</sup>   | 0.47±0.05 <sup>c</sup>   | 4.57±0.32 <sup>b</sup>   | 10.89±1.21 <sup>a</sup>   | 12.12±0.55 <sup>a</sup>   | 2.56±0.32 <sup>b</sup>   | 1.77±0.19 <sup>b</sup>   | 49.10±6.01 <sup>ab</sup> |
|                                   | Gisela 6   | 0.42±0.10 <sup>b</sup>   | 5.51±0.34 <sup>a</sup>   | 1.05±0.10 <sup>e</sup>   | 2.60±0.20 <sup>ab</sup>  | 2.34±0.25 <sup>ab</sup>  | 0.66±0.03 <sup>a</sup>   | 4.56±0.32 <sup>b</sup>   | 7.15±0.65 <sup>b</sup>    | 12.87±0.71 <sup>a</sup>   | 3.98±0.41 <sup>a</sup>   | 2.54±0.30 <sup>a</sup>   | 48.39±4.26 <sup>ab</sup> |
| Year                              | 2020       | 0.49±0.05                | 4.25±0.28 <sup>b</sup>   | 2.13±0.21 <sup>a</sup>   | 2.46±0.16 <sup>a</sup>   | 2.21±0.14                | 0.45±0.03 <sup>b</sup>   | 5.70±0.30 <sup>a</sup>   | 11.98±0.69 <sup>a</sup>   | 10.19±0.19 <sup>b</sup>   | 2.17±0.19 <sup>b</sup>   | 1.73±0.13 <sup>b</sup>   | 45.03±2.51               |
|                                   | 2021       | 0.42±0.03                | 6.54±0.27 <sup>a</sup>   | 1.49±0.07 <sup>b</sup>   | 2.39±0.14 <sup>a</sup>   | 2.14±0.13                | 0.61±0.02 <sup>a</sup>   | 4.61±0.16 <sup>b</sup>   | 7.07±0.57 <sup>b</sup>    | 11.84±0.55 <sup>a</sup>   | 2.75±0.18 <sup>a</sup>   | 1.98±0.14 <sup>a</sup>   | 42.64±1.56               |
| Statistical significance          |            |                          |                          |                          |                          |                          |                          |                          |                           |                           |                          |                          |                          |
| Cultivar                          |            | ns                       | ***                      | ***                      | ***                      | ***                      | ***                      | ***                      | ***                       | ***                       | ***                      | ***                      | ***                      |
| Rootstock                         |            | *                        | ***                      | ***                      | ***                      | ***                      | ***                      | ***                      | ***                       | ***                       | ***                      | ***                      | ***                      |
| Year                              |            | ns                       | ***                      | ***                      | ns                       | ns                       | ***                      | ***                      | ***                       | ***                       | ***                      | *                        | ns                       |
| Cultivar × Rootstock              |            | **                       | **                       | ***                      | *                        | *                        | ***                      | *                        | ***                       | **                        | ***                      | **                       | *                        |

Data are presented as means ± standard errors (n=3). Different superscript letter in a same column (factor) denotes significant difference (Tukey's test,  $p < 0.05$ ). Statistical significance: ns - not significant; \*  $p < 0.05$ ; \*\*  $p < 0.01$ ; \*\*\*  $p < 0.001$ .

**Table S3.** Content of all individual and total hydroxycinnamic acids in fruits of sweet cherry cultivars on different rootstocks (mg/kg fresh weight, average 2020-2021).

| Combination<br>cultivar/rootstock |            | 3- <i>p</i> -coumaroyl-<br>quinic acid | 4- <i>p</i> -<br>coumaroyl-<br>quinic acid | Dicaffeoyl-<br>quinic acid 1 | Dicaffeoyl-<br>quinic acid 2 | Caffeoyquinic<br>acid glycoside 1 | Caffeoyquinic<br>acid glycoside 2 | Caffeic acid<br>glycoside 1 | <i>cis</i> -3-caffeoyl-<br>quinic acid | Neochlorogenic acid<br>( <i>trans</i> 3CQA) |
|-----------------------------------|------------|----------------------------------------|--------------------------------------------|------------------------------|------------------------------|-----------------------------------|-----------------------------------|-----------------------------|----------------------------------------|---------------------------------------------|
| Carmen/Mahaleb                    |            | 0.0017±0.0002                          | 0.012±0.002 <sup>ef</sup>                  | 0.014±0.002 <sup>a-c</sup>   | 0.0155±0.0009                | 3.05±0.20 <sup>c-e</sup>          | 4.25±0.52 <sup>de</sup>           | 0.035±0.002                 | 2.42±0.17 <sup>c-f</sup>               | 65.46±7.82 <sup>cd</sup>                    |
| Carmen/Colt                       |            | 0.0015±0.0002                          | 0.015±0.002 <sup>d-f</sup>                 | 0.018±0.003 <sup>a-c</sup>   | 0.0098±0.0011                | 2.71±0.28 <sup>d-e</sup>          | 4.74±0.32 <sup>b-e</sup>          | 0.043±0.002                 | 2.96±0.19 <sup>a-f</sup>               | 73.56±5.28 <sup>b-d</sup>                   |
| Carmen/Oblacinska                 |            | 0.0024±0.0004                          | 0.012±0.001 <sup>d-f</sup>                 | 0.010±0.002 <sup>c</sup>     | 0.0862±0.0012                | 2.77±0.28 <sup>d-e</sup>          | 4.30±0.40 <sup>de</sup>           | 0.045±0.005                 | 3.08±0.04 <sup>a-f</sup>               | 91.55±4.68 <sup>ab</sup>                    |
| Carmen/M×M 14                     |            | 0.0016±0.0002                          | 0.015±0.002 <sup>d-f</sup>                 | 0.012±0.002 <sup>bc</sup>    | 0.0951±0.0008                | 3.12±0.27 <sup>b-e</sup>          | 4.77±0.18 <sup>b-e</sup>          | 0.042±0.002                 | 2.9±0.16 <sup>b-f</sup>                | 74.37±3.53 <sup>b-d</sup>                   |
| Carmen/Gisela 5                   |            | 0.0027±0.0004                          | 0.015±0.002 <sup>d-f</sup>                 | 0.016±0.004 <sup>a-c</sup>   | 0.0103±0.0012                | 3.71±0.14 <sup>a-d</sup>          | 6.16±0.3 <sup>a-c</sup>           | 0.061±0.007                 | 4.22±0.48 <sup>a</sup>                 | 99.29±11.51 <sup>a</sup>                    |
| Carmen/Gisela 6                   |            | 0.0023±0.0002                          | 0.014±0.004 <sup>d-f</sup>                 | 0.018±0.004 <sup>a-c</sup>   | 0.0106±0.0010                | 3.43±0.25 <sup>a-e</sup>          | 5.99±0.30 <sup>a-c</sup>          | 0.045±0.003                 | 3.13±0.24 <sup>a-e</sup>               | 81.10±6.56 <sup>a-c</sup>                   |
| Kordia/Mahaleb                    |            | 0.0012±0.0004                          | 0.026±0.003 <sup>a-e</sup>                 | 0.022±0.002 <sup>a-c</sup>   | 0.0074±0.0014                | 4.17±0.20 <sup>a-c</sup>          | 5.56±0.20 <sup>a-d</sup>          | 0.040±0.003                 | 2.77±0.23 <sup>b-f</sup>               | 44.62 ±5.17 <sup>ef</sup>                   |
| Kordia/Colt                       |            | 0.0011±0.0003                          | 0.034±0.005 <sup>ab</sup>                  | 0.024±0.006 <sup>a-c</sup>   | 0.0084±0.0024                | 3.94±0.50 <sup>a-d</sup>          | 6.75±1.06 <sup>a</sup>            | 0.049±0.005                 | 3.36±0.34 <sup>a-d</sup>               | 60.68±5.60 <sup>de</sup>                    |
| Kordia/Oblacinska                 |            | 0.0019±0.0005                          | 0.036±0.009 <sup>a</sup>                   | 0.028±0.008 <sup>ab</sup>    | 0.0079±0.0020                | 4.43±0.37 <sup>ab</sup>           | 6.13±0.43 <sup>a-c</sup>          | 0.050±0.003                 | 3.41±0.22 <sup>a-c</sup>               | 61.96±5.23 <sup>de</sup>                    |
| Kordia/M×M 14                     |            | 0.0012±0.0002                          | 0.031±0.003 <sup>a-c</sup>                 | 0.026±0.008 <sup>a-c</sup>   | 0.0053±0.0012                | 3.28±0.31 <sup>a-e</sup>          | 5.67±0.48 <sup>a-d</sup>          | 0.030±0.005                 | 2.05±0.34 <sup>ef</sup>                | 46.42±4.28 <sup>ef</sup>                    |
| Kordia/Gisela 5                   |            | 0.0017±0.0006                          | 0.031±0.008 <sup>a-c</sup>                 | 0.029±0.007 <sup>a</sup>     | 0.0069±0.0018                | 4.61±0.39 <sup>a</sup>            | 6.75±0.35 <sup>a</sup>            | 0.052±0.004                 | 3.63±0.27 <sup>a-c</sup>               | 68.31±9.49 <sup>cd</sup>                    |
| Kordia/Gisela 6                   |            | 0.0015±0.0005                          | 0.020±0.001 <sup>b-f</sup>                 | 0.018±0.004 <sup>a-c</sup>   | 0.0078±0.0019                | 4.29±0.21 <sup>ab</sup>           | 6.26± 0.46 <sup>ab</sup>          | 0.054±0.009                 | 3.71±0.62 <sup>ab</sup>                | 73.30±20.96 <sup>cd</sup>                   |
| Regina/Mahaleb                    |            | 0.0015±0.0004                          | 0.015±0.001 <sup>ef</sup>                  | 0.027±0.006 <sup>ab</sup>    | 0.0061±0.0012                | 2.31±0.34 <sup>e</sup>            | 3.74 ±0.46 <sup>e</sup>           | 0.026±0.001                 | 1.83±0.09 <sup>f</sup>                 | 17.58±2.18 <sup>g</sup>                     |
| Regina/Colt                       |            | 0.0013±0.0004                          | 0.015±0.002 <sup>ef</sup>                  | 0.026±0.004 <sup>a-c</sup>   | 0.0093±0.0015                | 2.63±0.45 <sup>d-e</sup>          | 4.76±0.81 <sup>b-e</sup>          | 0.039±0.007                 | 2.72±0.54 <sup>b-f</sup>               | 40.16±4.71 <sup>f</sup>                     |
| Regina/Oblacinska                 |            | 0.0010±0.0002                          | 0.016±0.001 <sup>d-f</sup>                 | 0.028±0.002 <sup>ab</sup>    | 0.0103±0.0021                | 3.80±0.46 <sup>a-d</sup>          | 5.66±0.35 <sup>a-d</sup>          | 0.048±0.004                 | 3.33±0.28 <sup>a-d</sup>               | 46.80±6.91 <sup>ef</sup>                    |
| Regina/M×M 14                     |            | 0.0022±0.0002                          | 0.019±0.001 <sup>c-f</sup>                 | 0.031±0.006 <sup>a</sup>     | 0.0101±0.0020                | 3.22±0.65 <sup>b-e</sup>          | 4.50±0.49 <sup>c-e</sup>          | 0.030±0.003                 | 2.09±0.24 <sup>d-f</sup>               | 33.31±3.87 <sup>fg</sup>                    |
| Regina/Gisela 6                   |            | 0.0023±0.0001                          | 0.023± 0.002 <sup>b-e</sup>                | 0.022±0.002 <sup>a-c</sup>   | 0.0154±0.0073                | 2.80±0.14 <sup>c-e</sup>          | 4.56±0.39 <sup>b-e</sup>          | 0.095±0.006                 | 2.12±0.20 <sup>d-f</sup>               | 30.06±1.33 <sup>g</sup>                     |
| Cultivar                          | Carmen     | 0.0020±0.0001                          | 0.049±0.001 <sup>b</sup>                   | 0.015±0.001 <sup>b</sup>     | 0.0107±0.0006 <sup>c</sup>   | 5.04±0.19 <sup>b</sup>            | 3.13±0.11 <sup>b</sup>            | 0.045±0.002                 | 3.12±0.15 <sup>a</sup>                 | 40.3±1.7 <sup>b</sup>                       |
|                                   | Kordia     | 0.0014±0.0002                          | 0.030±0.002 <sup>a</sup>                   | 0.024±0.002 <sup>a</sup>     | 0.0073±0.0007 <sup>b</sup>   | 6.19±0.223 <sup>a</sup>           | 4.12±0.15 <sup>a</sup>            | 0.046±0.002                 | 3.16±0.16 <sup>a</sup>                 | 44.3±3.5 <sup>a</sup>                       |
|                                   | Regina     | 0.0017±0.0002                          | 0.017±0.001 <sup>ab</sup>                  | 0.027±0.002 <sup>a</sup>     | 0.0102±0.0016 <sup>a</sup>   | 4.64±0.25 <sup>b</sup>            | 2.95±0.21 <sup>b</sup>            | 0.048±0.013                 | 2.42±0.16 <sup>b</sup>                 | 44.1±2.6 <sup>a</sup>                       |
| Rootstock                         | Mahaleb    | 0.0014±0.0014                          | 0.018±0.002                                | 0.021±0.002                  | 0.010±0.001                  | 4.52±0.29 <sup>c</sup>            | 3.18±0.23                         | 0.034±0.002                 | 2.34±0.13 <sup>c</sup>                 | 33.4±2.7 <sup>c</sup>                       |
|                                   | Colt       | 0.0013±0.0001                          | 0.021±0.003                                | 0.023±0.003                  | 0.009±0.001                  | 5.42±0.49 <sup>bc</sup>           | 3.10±0.27                         | 0.044±0.003                 | 3.01±0.22 <sup>ab</sup>                | 45.4±5.8 <sup>ab</sup>                      |
|                                   | Oblacinska | 0.0018±0.0003                          | 0.021±0.004                                | 0.022±0.003                  | 0.009±0.001                  | 5.36±0.28 <sup>bc</sup>           | 3.67±0.27                         | 0.048±0.003                 | 3.28±0.17 <sup>ab</sup>                | 48.3±3.9 <sup>a</sup>                       |
|                                   | MxM 14     | 0.0017±0.0001                          | 0.022±0.002                                | 0.023±0.004                  | 0.008±0.001                  | 4.98±0.25 <sup>bc</sup>           | 3.21±0.24                         | 0.034±0.002                 | 2.35±0.17 <sup>c</sup>                 | 41.2±4.3 <sup>bc</sup>                      |
|                                   | Gisela 5   | 0.0022±0.0004                          | 0.023±0.002                                | 0.023±0.002                  | 0.009±0.001                  | 6.45±0.26 <sup>a</sup>            | 4.16±0.24                         | 0.057±0.004                 | 3.93±0.28 <sup>a</sup>                 | 46.5±6.0 <sup>ab</sup>                      |
|                                   | Gisela 6   | 0.0020±0.0004                          | 0.018±0.002                                | 0.020±0.002                  | 0.011±0.002                  | 5.61±0.28 <sup>ab</sup>           | 3.51±0.19                         | 0.065 ±0.021                | 2.99±0.27 <sup>ab</sup>                | 41.0±4.3 <sup>bc</sup>                      |
| Year                              | 2020       | 0.0017±0.0002                          | 0.022±0.002                                | 0.024±0.002 <sup>a</sup>     | 0.009±0.0001                 | 5.19±0.25                         | 3.19±0.16 <sup>b</sup>            | 0.045±0.002                 | 2.76±0.15 <sup>b</sup>                 | 43.8±2.5                                    |
|                                   | 2021       | 0.0017±0.0001                          | 0.019±0.001                                | 0.019±0.002 <sup>b</sup>     | 0.010±0.0001                 | 5.47±0.14                         | 3.67±0.12 <sup>a</sup>            | 0.046±0.002                 | 3.10±0.12 <sup>a</sup>                 | 41.8±1.6                                    |
| Statistical significance          |            |                                        |                                            |                              |                              |                                   |                                   |                             |                                        |                                             |
| Cultivar                          |            | ns                                     | ***                                        | ***                          | *                            | ***                               | ***                               | ns                          | ***                                    | ***                                         |
| Rootstock                         |            | ns                                     | ***                                        | ns                           | ns                           | ns                                | **                                | ns                          | ***                                    | ***                                         |
| Year                              |            | ns                                     | ns                                         | *                            | ns                           | ***                               | ns                                | ns                          | ***                                    | ***                                         |
| Cultivar × Rootstock              |            | ns                                     | *                                          | ns                           | ns                           | **                                | *                                 | ns                          | *                                      | **                                          |

Data are presented as means ± standard errors (n=3). Different superscript letter in a same column (factor) denotes significant difference (Tukey's test,  $p < 0.05$ ). Statistical significance: ns - not significant; \*  $p < 0.05$ ; \*\*  $p < 0.01$ ; \*\*\*  $p < 0.001$ .

Table S3. Continued

| Caffeic acid<br>hexoside 1 | Caffeoylquinic<br>acid glycoside 3 | Caffeic acid<br>hexoside 2 | <i>p</i> -coumaric<br>acid hexoside | <i>trans</i> -3- <i>p</i> -coumaroyl-<br>quinic acid | <i>trans</i> 4-caffeoyl-<br>quinic acid | <i>trans</i> 5-caffeoyl-<br>quinic acid | <i>cis</i> -3- <i>p</i> -coumaroyl-<br>quinic acid | <i>cis</i> 3-feruloyl-<br>quinic acid | <i>cis</i> 4-caffeoyl-<br>quinic acid |
|----------------------------|------------------------------------|----------------------------|-------------------------------------|------------------------------------------------------|-----------------------------------------|-----------------------------------------|----------------------------------------------------|---------------------------------------|---------------------------------------|
| 0.08±0.01 <sup>de</sup>    | 10.97±1.89                         | 29.33±4.91 <sup>f-i</sup>  | 5.48±0.92 <sup>e-h</sup>            | 29.67±3.61 <sup>fg</sup>                             | 1.12±0.14 <sup>d-f</sup>                | 7.59±0.99                               | 0.13±0.02                                          | 0.06±0.01                             | 0.51±0.05                             |
| 0.09±0.00 <sup>de</sup>    | 17.66±1.56                         | 51.71±5.44 <sup>b-g</sup>  | 9.66±1.02 <sup>c-e</sup>            | 32.39±2.72 <sup>ef</sup>                             | 1.22±0.10 <sup>d-f</sup>                | 9.51±0.44                               | 0.17±0.01                                          | 0.07±0.01                             | 0.60±0.04                             |
| 0.12±0.03 <sup>a-e</sup>   | 13.34±1.42                         | 36.42±3.17 <sup>e-i</sup>  | 6.81±1.71 <sup>d-h</sup>            | 56.65±3.55 <sup>a</sup>                              | 2.14±0.13 <sup>a</sup>                  | 11.19±0.58                              | 0.19±0.01                                          | 0.08±0.01                             | 0.65± 0.05                            |
| 0.11±0.00 <sup>b-e</sup>   | 18.49±1.33                         | 49.70±5.10 <sup>b-h</sup>  | 9.29±1.29 <sup>c-f</sup>            | 37.05±3.0 <sup>de</sup>                              | 1.40±0.12 <sup>c-e</sup>                | 8.87±0.42                               | 0.15±0.01                                          | 0.07±0.01                             | 0.60±0.06                             |
| 0.14±0.02 <sup>a-d</sup>   | 17.70±1.13                         | 42.08±4.66 <sup>d-i</sup>  | 7.87±0.81 <sup>d-g</sup>            | 50.59±4.95 <sup>ab</sup>                             | 1.91±0.30 <sup>ab</sup>                 | 10.84±1.03                              | 0.19±0.02                                          | 0.08±0.01                             | 0.71±0.05                             |
| 0.08±0.01 <sup>de</sup>    | 9.82±1.81                          | 28.70±2.55 <sup>g-i</sup>  | 5.36±0.85 <sup>f-h</sup>            | 39.45±3.78 <sup>cd</sup>                             | 1.49±0.14 <sup>b-d</sup>                | 9.18±0.84                               | 0.16±0.01                                          | 0.07±0.01                             | 0.63±0.06                             |
| 0.11±0.02 <sup>b-e</sup>   | 16.04±0.52                         | 45.69±3.64 <sup>b-i</sup>  | 8.54±0.68 <sup>c-f</sup>            | 25.61±1.41 <sup>gh</sup>                             | 0.97±0.05 <sup>e-f</sup>                | 6.90±0.26                               | 0.12±0.01                                          | 0.05±0.01                             | 0.35±0.02                             |
| 0.17±0.02 <sup>a</sup>     | 24.80±1.52                         | 85.71±7.56 <sup>a</sup>    | 16.02±2.03 <sup>a</sup>             | 30.23±3.39 <sup>fg</sup>                             | 1.14±0.13 <sup>d-f</sup>                | 12.93±1.74                              | 0.22±0.05                                          | 0.10±0.02                             | 0.48±0.03                             |
| 0.15±0.01 <sup>a-c</sup>   | 19.74±1.98                         | 57.24±5.48 <sup>b-f</sup>  | 10.70±1.96 <sup>b-d</sup>           | 37.06±3.01 <sup>de</sup>                             | 1.40±0.11 <sup>c-e</sup>                | 10.65±1.05                              | 0.19±0.02                                          | 0.08±0.01                             | 0.44±0.02                             |
| 0.16±0.03 <sup>ab</sup>    | 27.89±2.81                         | 76.62±6.80 <sup>ab</sup>   | 14.32±1.83 <sup>ab</sup>            | 27.84±2.50 <sup>fg</sup>                             | 1.05±0.09 <sup>d-f</sup>                | 8.23±1.37                               | 0.14±0.02                                          | 0.06±0.01                             | 0.38±0.02                             |
| 0.13±0.01 <sup>a-d</sup>   | 19.46±1.28                         | 57.62±5.88 <sup>a-e</sup>  | 10.77±1.41 <sup>b-d</sup>           | 45.30±4.05 <sup>bc</sup>                             | 1.71±0.15 <sup>a-c</sup>                | 12.21±0.59                              | 0.21±0.01                                          | 0.09±0.01                             | 0.50±0.02                             |
| 0.10±0.02 <sup>c-e</sup>   | 14.18±0.94                         | 37.12±3.78 <sup>e-i</sup>  | 6.94±1.08 <sup>d-h</sup>            | 45.65±5.49 <sup>b</sup>                              | 1.73±0.19 <sup>a-c</sup>                | 11.34±1.24                              | 0.20±0.04                                          | 0.08±0.02                             | 0.52±0.05                             |
| 0.06±0.01 <sup>e</sup>     | 9.06±0.89                          | 18.20±1.77 <sup>i</sup>    | 3.40±0.33 <sup>h</sup>              | 8.61±1.47 <sup>h</sup>                               | 0.33±0.05 <sup>g</sup>                  | 2.54±0.26                               | 0.04±0.01                                          | 0.02±0.01                             | 0.39±0.02                             |
| 0.10±0.02 <sup>c-e</sup>   | 13.05±2.82                         | 43.39±4.20 <sup>b-i</sup>  | 8.11±1.72 <sup>d-g</sup>            | 21.20±2.85 <sup>hi</sup>                             | 0.80±0.11 <sup>fg</sup>                 | 6.07±1.25                               | 0.11±0.02                                          | 0.05±0.01                             | 0.35±0.03                             |
| 0.13±0.02 <sup>a-d</sup>   | 16.04±1.51                         | 66.48±5.66 <sup>a-d</sup>  | 12.43±1.18 <sup>a-c</sup>           | 25.19±4.69 <sup>gh</sup>                             | 0.95±0.18 <sup>ef</sup>                 | 8.16±1.18                               | 0.14±0.02                                          | 0.06±0.01                             | 0.37±0.04                             |
| 0.09±0.01 <sup>de</sup>    | 14.75±1.58                         | 67.75±7.80 <sup>a-c</sup>  | 12.66±1.70 <sup>ab</sup>            | 19.73 ±3.90 <sup>hi</sup>                            | 0.75±0.15 <sup>fg</sup>                 | 5.69±1.34                               | 0.10±0.02                                          | 0.04±0.01                             | 0.40±0.03                             |
| 0.11±0.01 <sup>a-e</sup>   | 14.31±1.06                         | 23.07±2.90 <sup>hi</sup>   | 4.00±0.50 <sup>gh</sup>             | 16.60±1.77 <sup>ij</sup>                             | 0.82±0.10 <sup>fg</sup>                 | 5.15±0.70                               | 0.20±0.01                                          | 0.09±0.02                             | 0.45±0.04                             |
| 0.11±0.01 <sup>b</sup>     | 14.66±1.27 <sup>b</sup>            | 39.66±2.99 <sup>b</sup>    | 7.41±0.56 <sup>b</sup>              | 40.97±2.35 <sup>a</sup>                              | 1.55±0.09 <sup>a</sup>                  | 9.53±0.35 <sup>a</sup>                  | 0.17±0.01 <sup>a</sup>                             | 0.07±0.02 <sup>a</sup>                | 0.62±0.04 <sup>a</sup>                |
| 0.14±0.01 <sup>a</sup>     | 20.35±1.37 <sup>a</sup>            | 60.00±5.39 <sup>a</sup>    | 11.21±1.01 <sup>a</sup>             | 35.28±2.35 <sup>b</sup>                              | 1.33±0.09 <sup>b</sup>                  | 10.38±0.71 <sup>a</sup>                 | 0.18±0.01 <sup>a</sup>                             | 0.08±0.1 <sup>a</sup>                 | 0.44±0.02 <sup>b</sup>                |
| 0.10±0.01 <sup>b</sup>     | 13.44±1.34 <sup>b</sup>            | 43.78±4.04 <sup>b</sup>    | 8.12±1.14 <sup>b</sup>              | 18.26±1.68 <sup>c</sup>                              | 0.73±0.09 <sup>c</sup>                  | 5.52±0.55 <sup>b</sup>                  | 0.12±0.02 <sup>b</sup>                             | 0.05±0.01 <sup>b</sup>                | 0.39±0.02 <sup>b</sup>                |
| 0.09±0.01 <sup>c</sup>     | 12.02±1.31 <sup>c</sup>            | 31.07±3.39 <sup>c</sup>    | 5.81±0.63 <sup>c</sup>              | 21.30±2.56 <sup>d</sup>                              | 0.80±0.10 <sup>d</sup>                  | 5.67±0.64 <sup>d</sup>                  | 0.10±0.01 <sup>b</sup>                             | 0.04±0.01 <sup>b</sup>                | 0.41±0.02 <sup>c</sup>                |
| 0.12±0.01 <sup>ab</sup>    | 18.50±1.34 <sup>a</sup>            | 60.27±5.75 <sup>ab</sup>   | 11.26±1.63 <sup>ab</sup>            | 27.94±2.01 <sup>cd</sup>                             | 1.06±0.08 <sup>c</sup>                  | 9.50±1.17 <sup>bc</sup>                 | 0.17±0.02 <sup>a</sup>                             | 0.07±0.01 <sup>a</sup>                | 0.48±0.03 <sup>a-c</sup>              |
| 0.13±0.01 <sup>a</sup>     | 16.38±1.78 <sup>b</sup>            | 53.38±4.45 <sup>ab</sup>   | 9.98±1.21 <sup>ab</sup>             | 39.63±3.76 <sup>ab</sup>                             | 1.50±0.14 <sup>b</sup>                  | 10.00±0.62 <sup>ab</sup>                | 0.17±0.01 <sup>a</sup>                             | 0.07±0.01 <sup>a</sup>                | 0.48±0.04 <sup>a-c</sup>              |
| 0.12±0.01 <sup>ab</sup>    | 20.38±2.08 <sup>a</sup>            | 64.69±5.60 <sup>a</sup>    | 12.09±1.42 <sup>a</sup>             | 28.21±2.45 <sup>c</sup>                              | 1.07±0.09 <sup>c</sup>                  | 7.60±0.70 <sup>cd</sup>                 | 0.13±0.01 <sup>ab</sup>                            | 0.06±0.01 <sup>ab</sup>               | 0.46±0.03 <sup>bc</sup>               |
| 0.13±0.01 <sup>a</sup>     | 18.58±1.85 <sup>a</sup>            | 49.85±4.03 <sup>b</sup>    | 9.32±1.50 <sup>b</sup>              | 47.94±4.33 <sup>a</sup>                              | 1.81±0.16 <sup>a</sup>                  | 11.52±0.60 <sup>a</sup>                 | 0.20±0.01 <sup>a</sup>                             | 0.09±0.01 <sup>a</sup>                | 0.60±0.06 <sup>a</sup>                |
| 0.10±0.01 <sup>bc</sup>    | 12.77±1.04 <sup>bc</sup>           | 29.63±2.85 <sup>c</sup>    | 5.43±0.54 <sup>c</sup>              | 33.90±4.66 <sup>bc</sup>                             | 1.34±0.16 <sup>bc</sup>                 | 8.56±1.00 <sup>bc</sup>                 | 0.19±0.03 <sup>a</sup>                             | 0.08±0.02 <sup>a</sup>                | 0.53±0.05 <sup>ab</sup>               |
| 0.09±0.01 <sup>b</sup>     | 14.70±1.41 <sup>b</sup>            | 56.52±5.25 <sup>a</sup>    | 10.53±0.99 <sup>a</sup>             | 29.73±2.06 <sup>b</sup>                              | 1.15±0.08 <sup>b</sup>                  | 8.77±0.57                               | 0.17±0.01                                          | 0.07±0.01                             | 0.55±0.03 <sup>a</sup>                |
| 0.14±0.01 <sup>a</sup>     | 17.92±0.83 <sup>a</sup>            | 39.58±2.00 <sup>b</sup>    | 7.40±0.37 <sup>b</sup>              | 34.83±0.33 <sup>a</sup>                              | 1.32±0.09 <sup>a</sup>                  | 8.53±0.51                               | 0.15±0.01                                          | 0.06±0.01                             | 0.43±0.02 <sup>b</sup>                |
| ***                        | ***                                | ***                        | ***                                 | ***                                                  | ***                                     | ***                                     | *                                                  | *                                     | ***                                   |
| ***                        | ***                                | ***                        | ***                                 | ***                                                  | ***                                     | ***                                     | **                                                 | **                                    | **                                    |
| ***                        | **                                 | ***                        | ***                                 | ***                                                  | ***                                     | ns                                      | ns                                                 | ns                                    | ***                                   |
| **                         | ns                                 | ***                        | ***                                 | ***                                                  | ***                                     | ***                                     | ns                                                 | ns                                    | ns                                    |

Table S3. Continued

| <i>trans</i> 3-feruloyl-<br>quinic acid | Sinapic acid<br>hexoside | <i>trans</i> -5-feruloyl-<br>quinic acid | Caffeic acid<br>glycoside 2 | Feruloyl<br>hexoside     | <i>cis</i> 5-caffeoyl-<br>quinic acid | <i>trans</i> -4- <i>p</i> -couma-<br>roylquinic acid | <i>cis</i> -4- <i>p</i> -couma-<br>roylquinic acid | 5- <i>p</i> -coumaroyl-<br>quinic acid | Total hydroxy-<br>cinnamic acids |
|-----------------------------------------|--------------------------|------------------------------------------|-----------------------------|--------------------------|---------------------------------------|------------------------------------------------------|----------------------------------------------------|----------------------------------------|----------------------------------|
| 0.69±0.07 <sup>b-e</sup>                | 0.21±0.02 <sup>b-d</sup> | 0.30±0.03 <sup>ef</sup>                  | 0.11±0.02 <sup>cd</sup>     | 0.32±0.03 <sup>de</sup>  | 2.57±0.12 <sup>e-g</sup>              | 0.69±0.09 <sup>c-e</sup>                             | 0.31±0.02 <sup>c</sup>                             | 0.19±0.02                              | 111.1±14.8 <sup>fg</sup>         |
| 0.83±0.05 <sup>a-c</sup>                | 0.25±0.02 <sup>ab</sup>  | 0.37±0.04 <sup>d-f</sup>                 | 0.14±0.01 <sup>b-d</sup>    | 0.39±0.04 <sup>c-e</sup> | 2.29±0.23 <sup>d</sup>                | 0.48±0.04 <sup>de</sup>                              | 0.35±0.02 <sup>c</sup>                             | 0.25±0.03                              | 156.7±19.5 <sup>b-d</sup>        |
| 0.89±0.08 <sup>ab</sup>                 | 0.27±0.03 <sup>ab</sup>  | 0.32±0.03 <sup>ef</sup>                  | 0.12±0.03 <sup>cd</sup>     | 0.34±0.04 <sup>de</sup>  | 2.37±0.20 <sup>fd</sup>               | 0.92±0.06 <sup>a-c</sup>                             | 0.49±0.05 <sup>c</sup>                             | 0.30±0.03                              | 167.2±21.7 <sup>ab</sup>         |
| 0.82±0.09 <sup>a-c</sup>                | 0.25±0.03 <sup>a-c</sup> | 0.43±0.04 <sup>a-e</sup>                 | 0.16±0.02 <sup>a-c</sup>    | 0.46±0.06 <sup>a-e</sup> | 2.50±0.21 <sup>e-g</sup>              | 0.71±0.12 <sup>c-e</sup>                             | 0.38±0.02 <sup>c</sup>                             | 0.26±0.04                              | 161.1±19.8 <sup>a-c</sup>        |
| 0.97±0.10 <sup>a</sup>                  | 0.29±0.03 <sup>a</sup>   | 0.40±0.04 <sup>b-f</sup>                 | 0.15±0.03 <sup>a-d</sup>    | 0.42±0.04 <sup>a-e</sup> | 3.00±0.19 <sup>c-g</sup>              | 0.90±0.19 <sup>a-c</sup>                             | 0.45±0.04 <sup>c</sup>                             | 0.28±0.03                              | 190.9±26.8 <sup>a</sup>          |
| 0.87±0.08 <sup>ab</sup>                 | 0.26±0.02 <sup>ab</sup>  | 0.38±0.03 <sup>c-f</sup>                 | 0.14±0.02 <sup>b-d</sup>    | 0.40±0.05 <sup>b-e</sup> | 2.80±0.22 <sup>c-g</sup>              | 0.76±0.17 <sup>c-e</sup>                             | 0.35±0.03 <sup>c</sup>                             | 0.20±0.04                              | 123.6±14.1 <sup>de</sup>         |
| 0.47±0.03 <sup>fg</sup>                 | 0.14±0.01 <sup>g</sup>   | 0.45±0.02 <sup>a-e</sup>                 | 0.17±0.01 <sup>a-c</sup>    | 0.47±0.05 <sup>a-e</sup> | 3.10±0.10 <sup>b-f</sup>              | 0.75±0.11 <sup>c-e</sup>                             | 0.85±0.04 <sup>b</sup>                             | 0.23±0.02                              | 139.6±15.0 <sup>c-e</sup>        |
| 0.66±0.04 <sup>c-f</sup>                | 0.20±0.01 <sup>c-f</sup> | 0.57±0.05 <sup>a</sup>                   | 0.22±0.03 <sup>a</sup>      | 0.60±0.06 <sup>ab</sup>  | 3.58±0.16 <sup>a-c</sup>              | 0.71±0.12 <sup>c-e</sup>                             | 0.83±0.08 <sup>b</sup>                             | 0.32±0.04                              | 198.4±17.8 <sup>a</sup>          |
| 0.60±0.02 <sup>d-g</sup>                | 0.18±0.01 <sup>d-g</sup> | 0.55±0.05 <sup>ab</sup>                  | 0.21±0.02 <sup>a</sup>      | 0.58±0.05 <sup>a-c</sup> | 3.44±0.26 <sup>a-d</sup>              | 0.98±0.13 <sup>a-c</sup>                             | 0.81±0.07 <sup>b</sup>                             | 0.30±0.03                              | 179.1±19.9 <sup>ab</sup>         |
| 0.52±0.03 <sup>d-g</sup>                | 0.16±0.01 <sup>d-g</sup> | 0.54±0.05 <sup>a-c</sup>                 | 0.20±0.01 <sup>a</sup>      | 0.57±0.05 <sup>a-c</sup> | 3.01±0.17 <sup>c-g</sup>              | 0.80±0.13 <sup>b-d</sup>                             | 0.79±0.05 <sup>b</sup>                             | 0.28±0.03                              | 187.5±25.8 <sup>ab</sup>         |
| 0.69±0.03 <sup>b-e</sup>                | 0.21±0.01 <sup>c-e</sup> | 0.53±0.02 <sup>a-d</sup>                 | 0.20±0.01 <sup>a</sup>      | 0.56±0.02 <sup>a-c</sup> | 3.90±0.27 <sup>a</sup>                | 1.11±0.18 <sup>ab</sup>                              | 0.96±0.03 <sup>b</sup>                             | 0.40±0.02                              | 191.1±22.4 <sup>a</sup>          |
| 0.71±0.07 <sup>b-d</sup>                | 0.21±0.03 <sup>c-f</sup> | 0.51±0.06 <sup>a-d</sup>                 | 0.19±0.02 <sup>ab</sup>     | 0.54±0.06 <sup>a-c</sup> | 3.85±0.32 <sup>ab</sup>               | 1.20±0.15 <sup>a</sup>                               | 0.94±0.05 <sup>b</sup>                             | 0.34±0.05                              | 154.4±18.7 <sup>b-d</sup>        |
| 0.54±0.03 <sup>d-g</sup>                | 0.16±0.01 <sup>c-g</sup> | 0.26±0.04 <sup>f</sup>                   | 0.10±0.01 <sup>d</sup>      | 0.27±0.04 <sup>e</sup>   | 3.42±0.17 <sup>a-d</sup>              | 0.42±0.04 <sup>e</sup>                               | 0.84±0.08 <sup>b</sup>                             | 0.23±0.04                              | 75.9±13.2 <sup>g</sup>           |
| 0.48±0.02 <sup>fg</sup>                 | 0.14±0.01 <sup>g</sup>   | 0.43±0.04 <sup>a-e</sup>                 | 0.16±0.03 <sup>a-c</sup>    | 0.46±0.05 <sup>a-e</sup> | 2.65±0.22 <sup>d-g</sup>              | 0.74±0.12 <sup>c-e</sup>                             | 0.94±0.04 <sup>b</sup>                             | 0.27±0.03                              | 122.8±15.9 <sup>ef</sup>         |
| 0.51±0.05 <sup>e-g</sup>                | 0.15±0.02 <sup>fg</sup>  | 0.58±0.05 <sup>a</sup>                   | 0.22±0.02 <sup>a</sup>      | 0.61±0.07 <sup>a</sup>   | 3.24±0.11 <sup>a-e</sup>              | 0.94±0.16 <sup>a-c</sup>                             | 1.35±0.11 <sup>a</sup>                             | 0.27±0.05                              | 156.8±26.1 <sup>b-d</sup>        |
| 0.55±0.04 <sup>d-g</sup>                | 0.16±0.01 <sup>c-g</sup> | 0.47±0.04 <sup>a-e</sup>                 | 0.17±0.02 <sup>a-c</sup>    | 0.49±0.05 <sup>a-d</sup> | 3.23±0.16 <sup>a-e</sup>              | 0.76±0.14 <sup>c-e</sup>                             | 1.23±0.14 <sup>ab</sup>                            | 0.25±0.03                              | 153.9±23.2 <sup>b-e</sup>        |
| 0.41±0.07 <sup>g</sup>                  | 0.16±0.03 <sup>d-g</sup> | 0.51±0.03 <sup>a-d</sup>                 | 0.17±0.01 <sup>a-c</sup>    | 0.57±0.05 <sup>a-c</sup> | 3.09±0.08 <sup>b-f</sup>              | 0.90±0.08 <sup>a-c</sup>                             | 1.33±0.06 <sup>a</sup>                             | 0.52±0.06                              | 91.4±24.4 <sup>fg</sup>          |
| 0.85±0.05 <sup>a</sup>                  | 0.25±0.01                | 0.37±0.03 <sup>c</sup>                   | 0.14±0.01 <sup>b</sup>      | 0.39±0.03 <sup>c</sup>   | 2.59±0.09 <sup>c</sup>                | 0.74±0.07 <sup>b</sup>                               | 0.39±0.02 <sup>c</sup>                             | 0.24±0.02                              | 163.4±9.9 <sup>a</sup>           |
| 0.61±0.03 <sup>b</sup>                  | 0.18±0.01                | 0.53±0.02 <sup>a</sup>                   | 0.20±0.01 <sup>a</sup>      | 0.56±0.02 <sup>a</sup>   | 3.48±0.11 <sup>a</sup>                | 0.93±0.10 <sup>a</sup>                               | 0.86±0.08 <sup>b</sup>                             | 0.31±0.02                              | 154.5±15.0 <sup>a</sup>          |
| 0.49±0.02 <sup>c</sup>                  | 0.16±0.01                | 0.45±0.03 <sup>b</sup>                   | 0.16±0.02 <sup>b</sup>      | 0.48±0.03 <sup>b</sup>   | 3.13 ± 0.08 <sup>b</sup>              | 0.75±0.08 <sup>b</sup>                               | 1.14±0.07 <sup>a</sup>                             | 0.31±0.04                              | 139.9±13.5 <sup>b</sup>          |
| 0.57±0.03 <sup>c</sup>                  | 0.17±0.01 <sup>c</sup>   | 0.34±0.03 <sup>b</sup>                   | 0.13±0.01 <sup>b</sup>      | 0.35±0.03 <sup>b</sup>   | 3.03 ± 0.11 <sup>bc</sup>             | 0.62±0.08 <sup>c</sup>                               | 0.67±0.07 <sup>b</sup>                             | 0.21±0.02 <sup>b</sup>                 | 105.5±17.4 <sup>c</sup>          |
| 0.66±0.04 <sup>b</sup>                  | 0.20±0.01 <sup>b</sup>   | 0.46±0.04 <sup>a</sup>                   | 0.17±0.02 <sup>a</sup>      | 0.48±0.04 <sup>a</sup>   | 2.84 ± 0.17 <sup>c</sup>              | 0.65±0.09 <sup>c</sup>                               | 0.71±0.08 <sup>b</sup>                             | 0.28±0.03 <sup>ab</sup>                | 155.9±24.2 <sup>b</sup>          |
| 0.66±0.06 <sup>b</sup>                  | 0.20±0.02 <sup>b</sup>   | 0.48±0.05 <sup>a</sup>                   | 0.18±0.02 <sup>a</sup>      | 0.51±0.05 <sup>a</sup>   | 3.02±0.16 <sup>bc</sup>               | 0.94±0.09 <sup>a</sup>                               | 0.88±0.11 <sup>a</sup>                             | 0.29±0.03 <sup>ab</sup>                | 163.64±17.2 <sup>ab</sup>        |
| 0.63±0.05 <sup>bc</sup>                 | 0.19±0.01 <sup>bc</sup>  | 0.48±0.05 <sup>a</sup>                   | 0.18±0.01 <sup>a</sup>      | 0.51±0.03 <sup>a</sup>   | 2.91±0.13 <sup>bc</sup>               | 0.76±0.09 <sup>b</sup>                               | 0.80±0.10 <sup>ab</sup>                            | 0.26±0.02 <sup>ab</sup>                | 172.49±21.8 <sup>b</sup>         |
| 0.83±0.09 <sup>a</sup>                  | 0.25±0.03 <sup>a</sup>   | 0.47±0.05 <sup>a</sup>                   | 0.18±0.02 <sup>a</sup>      | 0.49±0.05 <sup>a</sup>   | 3.45±0.21 <sup>a</sup>                | 1.01±0.11 <sup>a</sup>                               | 0.71±0.08 <sup>b</sup>                             | 0.34±0.03 <sup>ab</sup>                | 180.97±22.0 <sup>a</sup>         |
| 0.66±0.08 <sup>b</sup>                  | 0.21±0.02 <sup>b</sup>   | 0.47±0.04 <sup>a</sup>                   | 0.17±0.02 <sup>a</sup>      | 0.50±0.05 <sup>a</sup>   | 3.25±.18 <sup>ab</sup>                | 0.95±0.16 <sup>a</sup>                               | 0.87±0.10 <sup>a</sup>                             | 0.35±0.03 <sup>a</sup>                 | 124.98±21.5 <sup>c</sup>         |
| 0.73±0.04 <sup>a</sup>                  | 0.22±0.01 <sup>a</sup>   | 0.38±0.03 <sup>b</sup>                   | 0.14±0.01 <sup>b</sup>      | 0.41±0.03 <sup>b</sup>   | 2.99±0.07                             | 0.41±0.02 <sup>b</sup>                               | 0.71±0.04 <sup>b</sup>                             | 0.29±0.03                              | 149.5±11.1 <sup>b</sup>          |
| 0.59±0.02 <sup>b</sup>                  | 0.18±0.01 <sup>b</sup>   | 0.51±0.01 <sup>a</sup>                   | 0.19±0.01 <sup>a</sup>      | 0.54±0.02 <sup>a</sup>   | 3.13±0.11                             | 1.21±0.07 <sup>a</sup>                               | 0.85±0.06 <sup>a</sup>                             | 0.29±0.01                              | 153.1±10.1 <sup>a</sup>          |
| ***                                     | ***                      | ***                                      | ***                         | ***                      | ***                                   | ***                                                  | ***                                                | ns                                     | ***                              |
| *                                       | **                       | ***                                      | ***                         | ***                      | *                                     | ***                                                  | ***                                                | *                                      | ***                              |
| ***                                     | ***                      | ***                                      | ***                         | ***                      | ns                                    | ***                                                  | ***                                                | ns                                     | ***                              |
| ***                                     | *                        | ***                                      |                             |                          | **                                    | **                                                   | ***                                                | ns                                     | *                                |

**Table S4.** Meteorological conditions during the first six months in the years of study (2020-2021).

| <b>Year</b> | <b>Month</b> | <b>Average temperature<br/>(°C)</b> | <b>Precipitation sum<br/>(mm)</b> | <b>Insolation<br/>(hours)</b> |
|-------------|--------------|-------------------------------------|-----------------------------------|-------------------------------|
| 2020        | January      | 2.0                                 | 22.1                              | 122.7                         |
|             | February     | 7.6                                 | 55.9                              | 120.2                         |
|             | March        | 9.1                                 | 48.0                              | 149.4                         |
|             | April        | 14.3                                | 8.9                               | 293.1                         |
|             | May          | 16.6                                | 70.9                              | 212.6                         |
|             | June         | 20.9                                | 158.5                             | 229.6                         |
| 2021        | January      | 2.8                                 | 68.6                              | 76.6                          |
|             | February     | 6.5                                 | 34.4                              | 130.4                         |
|             | March        | 7.2                                 | 49.3                              | 179.1                         |
|             | April        | 10.6                                | 50.7                              | 187.9                         |
|             | May          | 17.4                                | 93.4                              | 264.6                         |
|             | June         | 24.3                                | 34.2                              | 326.3                         |
